# Supplementary material for: A fat-tissue sensor couples growth to oxygen availability by remotely controlling insulin secretion
Source: Nat Commun. 2019 Apr 26;10:1955. doi: 10.1038/s41467-019-09943-y (PMC6486587; doi:10.1038/s41467-019-09943-y)
Supplement: Supplementary file 1 — Supplementary Information [file 41467_2019_9943_MOESM1_ESM.pdf]

Supplementary information

**A fat-tissue sensor couples growth to oxygen availability  
by remotely controlling insulin secretion**

Texada, *et al.*

**a**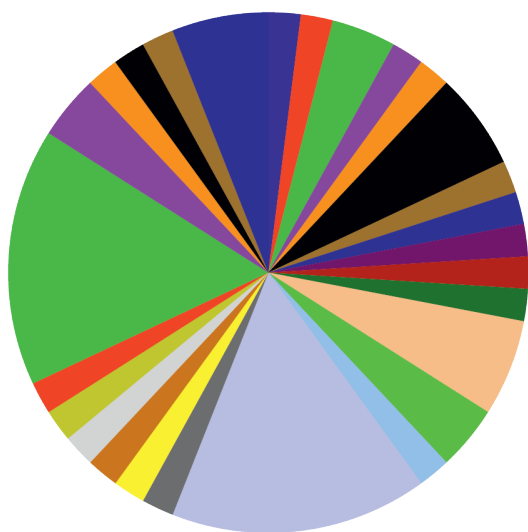

- Triacylglycerol metabolism
- Histamine H2 receptor mediated signaling pathway
- Apoptosis signaling pathway
- Angiogenesis
- Insulin/IGF pathway-protein kinase B signaling cascade
- Alpha adrenergic receptor signaling pathway
- Insulin/IGF pathway-MAP kinase cascade
- Corticotropin releasing factor receptor signaling pathway
- Enkephalin release
- Dopamine receptor mediated signaling pathway
- Endothelin signaling pathway
- 2-arachidonoylglycerol biosynthesis
- Gonadotropin-releasing hormone receptor pathway
- Nicotine pharmacodynamics pathway
- Blood coagulation
- CCKR signaling map
- Beta3 adrenergic receptor signaling pathway
- Beta2 adrenergic receptor signaling pathway
- Beta1 adrenergic receptor signaling pathway
- 5HT4 type receptor mediated signaling pathway
- Wnt signaling pathway
- Heterotrimeric G-protein signaling pathway
- 5HT1 type receptor mediated signaling pathway
- Transcription regulation by bZIP transcription factor
- TGF-beta signaling pathway
- FGF signaling pathway
- Plasminogen activating cascade

**b**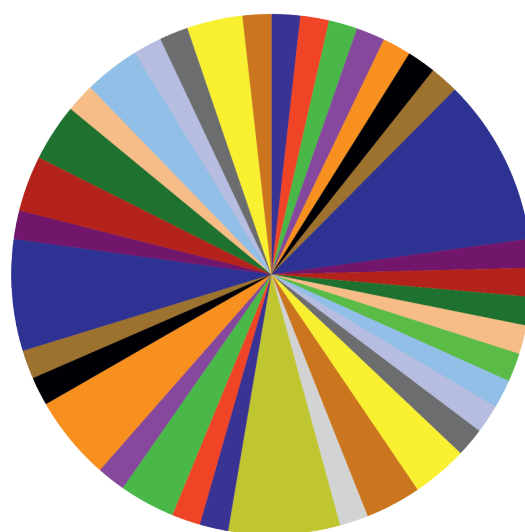

- BMP/activin signaling pathway-Drosophila
- Activin beta signaling pathway
- Beta3 adrenergic receptor signaling pathway
- Beta2 adrenergic receptor signaling pathway
- Metabotropic glutamate receptor group III pathway
- Beta1 adrenergic receptor signaling pathway
- 5HT4 type receptor mediated signaling pathway
- Angiogenesis
- Ionotropic glutamate receptor pathway
- 5HT3 type receptor mediated signaling pathway
- Alzheimer disease-presenilin pathway
- 5HT2 type receptor mediated signaling pathway
- 5HT1 type receptor mediated signaling pathway
- Adrenaline and noradrenaline biosynthesis
- ALP23B signaling pathway
- p53 pathway
- Wnt signaling pathway
- VEGF signaling pathway
- Thyrotropin-releasing hormone receptor signaling pathway
- FGF signaling pathway
- TGF-beta signaling pathway
- Oxytocin receptor mediated signaling pathway
- EGF receptor signaling pathway
- Opioid proopiomelanocortin pathway
- PDGF signaling pathway
- Opioid prodynorphin pathway
- Opioid proenkephalin pathway
- Cadherin signaling pathway
- Nicotinic acetylcholine receptor signaling pathway
- Blood coagulation
- Muscarinic acetylcholine receptor signaling pathway
- Dopamine receptor mediated signaling pathway
- Corticotropin releasing factor receptor signaling pathway
- CCKR signaling map
- Metabotropic glutamate receptor group II pathway
- Gonadotropin-releasing hormone receptor pathway
- MYO signaling pathway

**Supplementary Fig. 1. a-b** Gene-ontology (GO) analysis of hits from the RNAi screen whose knockdown is associated with increased (**a**) or decreased (**b**) pupal size. Underlying data are provided in the Source Data file.

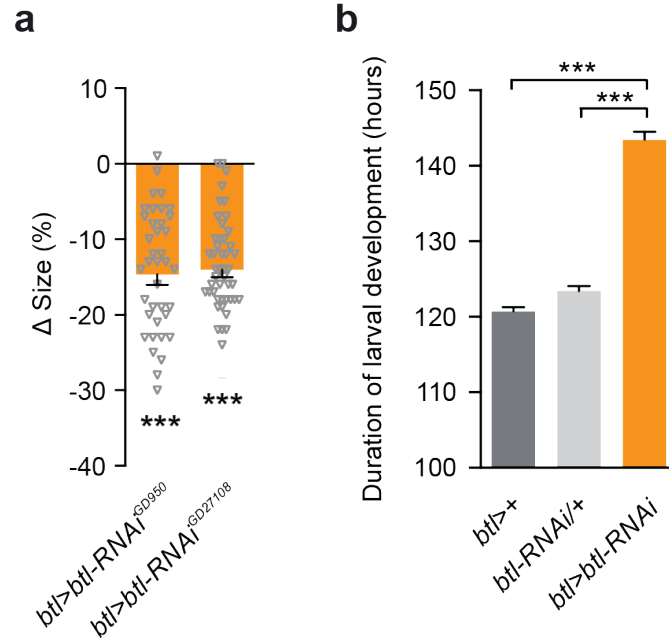

**Supplementary Fig. 2. a** Knockdown of *breathless* (*btl*) in the tracheae (*btl>btl-RNAi*) with two additional RNAi lines from VDRC (transformant ID numbers 950 and 27108) targeting independent sequences of *btl* reduces pupal body size compared to the control (*btl>* crossed to wild type, *w<sup>1118</sup>*). *n* = 39-48. **b** Duration of larval development determined by the onset of pupariation of animals with trachea-specific *btl* knockdown compared to *btl>+* driver (*btl>* crossed to wild type, *w<sup>1118</sup>*) and *btl-RNAi/+* (*btl-RNAi* crossed to wild type, *w<sup>1118</sup>*) controls. *n* = 46-69. Statistics: one-way ANOVA with Dunnett's multiple-comparisons test. \*\*\**P*<0.001, compared to the control. Error bars indicate standard error of the mean (SEM). Underlying data are provided in the Source Data file.

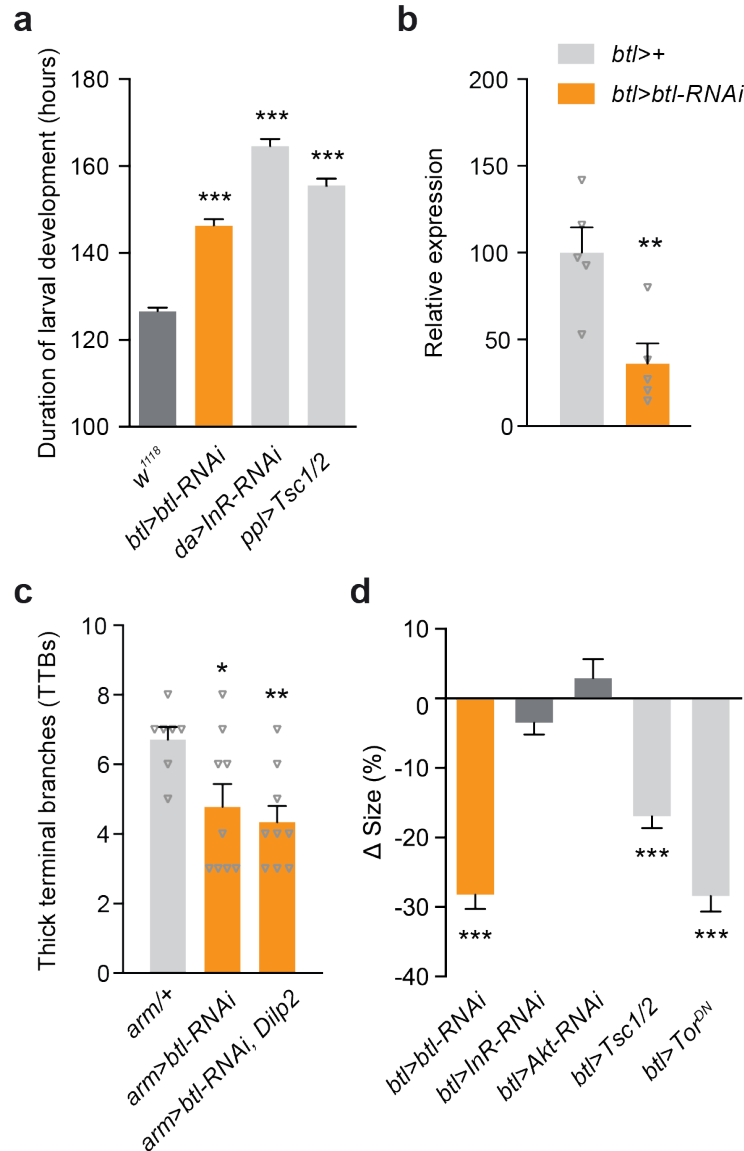

**Supplementary Fig. 3. a** Duration of larval development determined by the onset of pupariation of *da>InR-RNAi* animals with global knockdown of the insulin receptor (*InR*), and *ppl>Tsc1/2* animals with fat-body-specific Tor inhibition compared to controls (*w<sup>1118</sup>*). *n* = 60-74. **b** Transcript levels of the ecdysone-inducible *E75B* gene. *n* = 5. **c** Effect of global *btl* knockdown and *Dilp2* overexpression using the weak ubiquitous *arm>* driver on the number of thick terminal branches (TTBs) per terminal cell, quantified as the number of cell projections. *n* = 7-9. **d** Pupal size changes in animals with trachea-specific loss of *breathless* (*btl*) (*btl>btl-RNAi*), insulin signal transduction (*btl>InR-RNAi* and *btl>Akt-RNAi*), or Tor signaling (*btl>Tsc1/2* and *btl>Tor<sup>DN</sup>*) compared to *btl>+* controls (*btl>* crossed to wild type, *w<sup>1118</sup>*). *n* = 22-79. Statistics: one-way ANOVA with Dunnett's test for multiple comparisons and Student's t-test for pairwise comparisons. \**P*<0.05, \*\**P*<0.01, \*\*\**P*<0.001, compared to the control. Error bars indicate standard error of the mean (SEM). Underlying data are provided in the Source Data file.

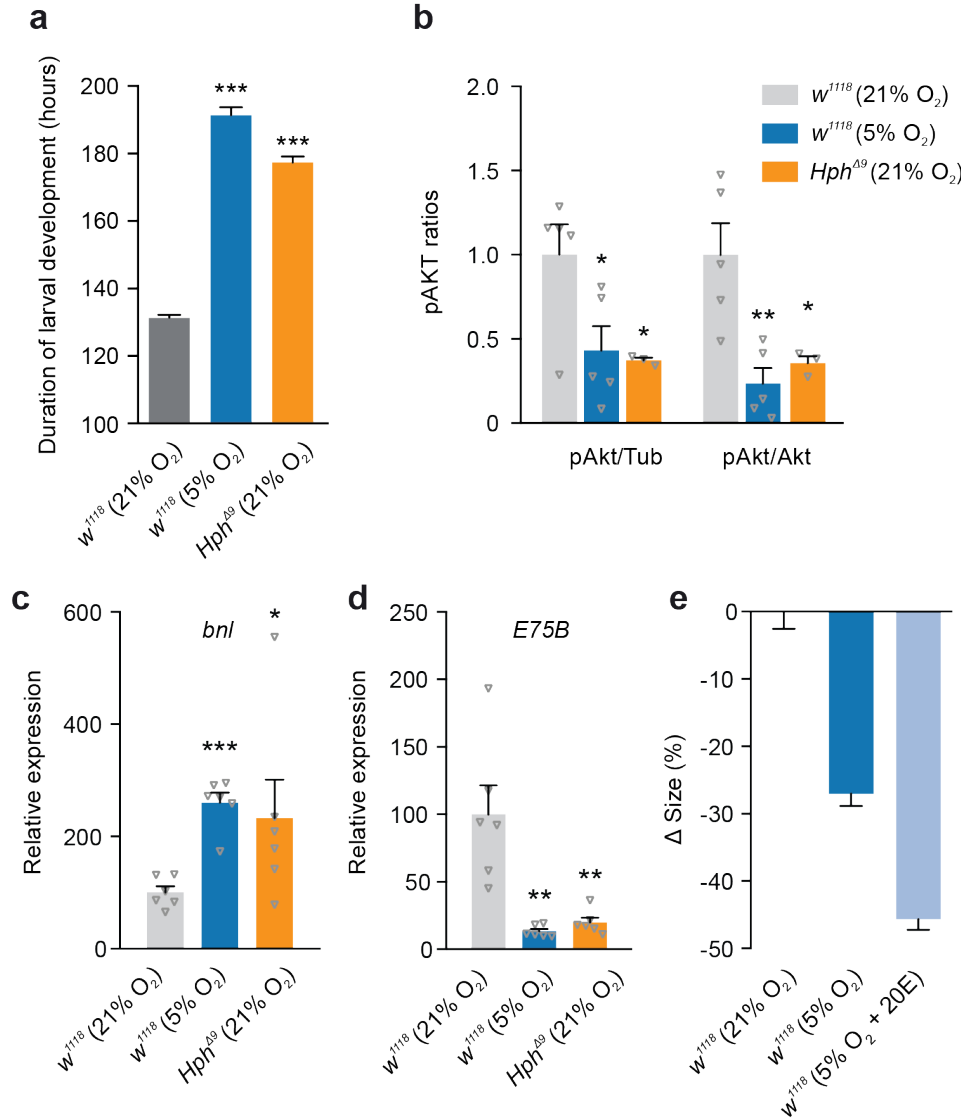

**Supplementary Fig. 4. a** Duration of larval development determined by the onset of pupariation of wild-type ( $w^{1118}$ ) animals under normoxia (21% O<sub>2</sub>) and hypoxia (5% O<sub>2</sub>), and *Hph* mutant animals under normoxia.  $n = 57-73$ . **b** Whole-animal levels of phosphorylated Akt (pAkt) kinase determined by immunoblotting in normoxia (21% O<sub>2</sub>) and hypoxia (5% O<sub>2</sub>), and *Hph* mutant animals normalized to alpha-Tubulin (Tub) or Akt levels.  $n = 3-5$ . **c-d** Transcript levels of *branchless* (*bnl*) (**c**) and ecdysone-inducible gene *E75B* (**d**) in whole larvae under normoxia in wild-types and *Hph* mutants and in wild-types under hypoxic conditions.  $n = 6$ . **e** Effects of 20-hydroxyecdysone (20E) feeding on pupal size of wild type ( $w^{1118}$ ) animals under hypoxia.  $n = 27-29$ . Statistics: one-way ANOVA with Dunnett's multiple-comparisons test. \* $P < 0.05$ , \*\* $P < 0.01$ , \*\*\* $P < 0.001$ , compared to the control. Error bars indicate standard error of the mean (SEM). Underlying data are provided in the Source Data file.

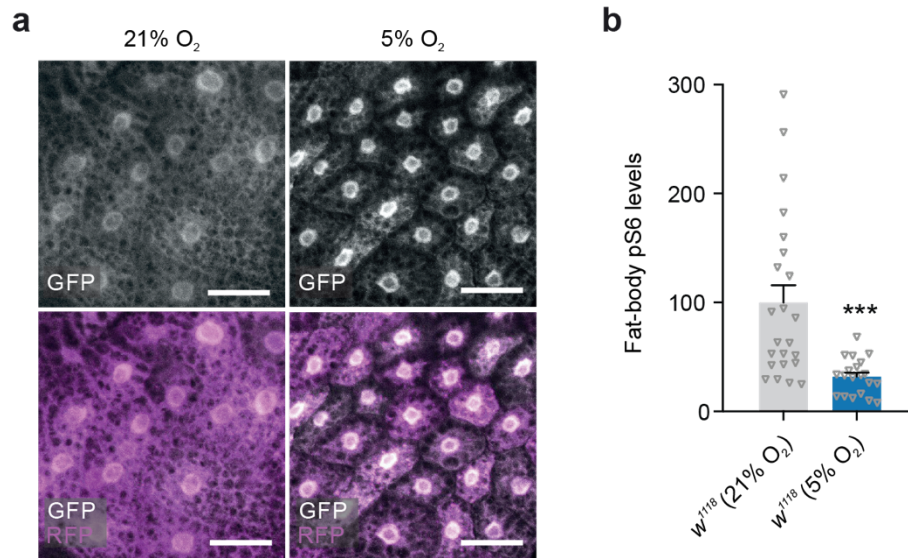

**Supplementary Fig. 5. a** Transgenic GFP::ODD (white) and RFP (magenta) reporter of hypoxia indicates that the fat body experiences low oxygen levels that inhibit Hph (increased GFP) when wild-type (*w*<sup>1118</sup>) animals are incubated under 5% O<sub>2</sub> compared to 21% O<sub>2</sub> conditions. Scale bar, 20 μm. **b** Fat-body phosphorylated ribosomal protein S6 (anti-pS6) levels are reduced in larvae reared under hypoxia (5% O<sub>2</sub>). *n* = 20-23. Statistics: Student's t-test for pairwise comparisons. \*\*\**P*<0.001, compared to the control. Error bars indicate standard error of the mean (SEM). Underlying data are provided in the Source Data file.

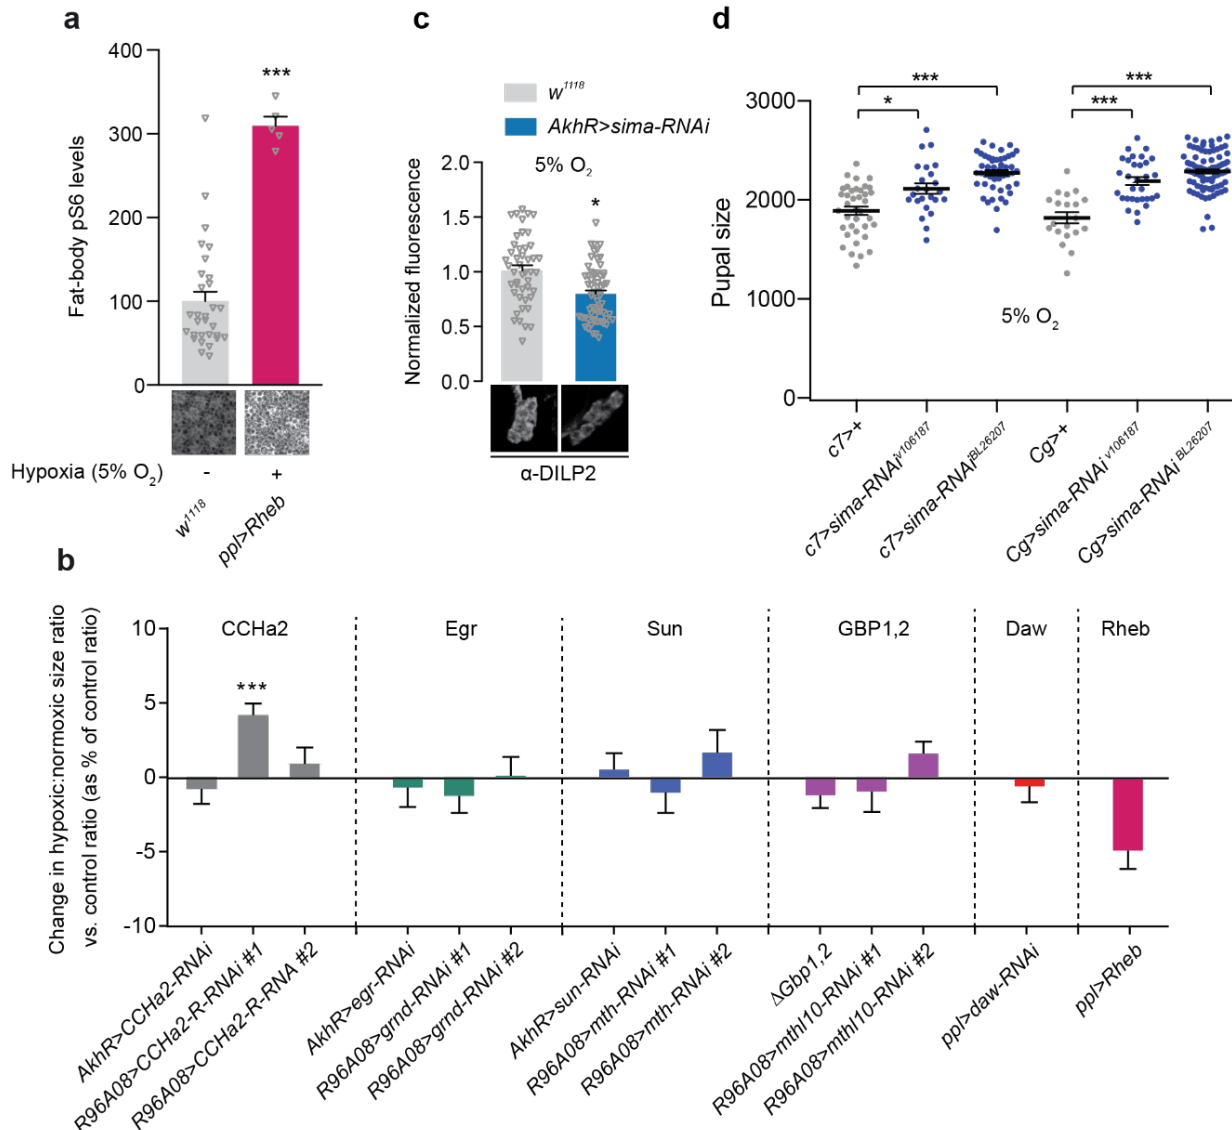

**Supplementary Fig. 6. a** Fat-body-specific expression of Rheb stimulates S6 phosphorylation under hypoxia, indicating increased Tor pathway activity.  $n = 5$ -30. **b** We conducted a mini-screen of known fat-body factors and IPC-expressed receptors for hypoxia-specific effects, hypothesizing that knocking down a factor or receptor that is involved in the insulinostatic response would rescue the size reduction (*i.e.*, lead to larger pupae) under hypoxia. *AkhR-GAL4::p65* (*AkhR*>) or *ppl-GAL4* (*ppl*>) drove RNAi against secreted factors and *Rheb* expression (inducing activation of Tor) in the fat body, while *R96A08-GAL4* (*R96A08*>) was used to knock down their respective receptors in the IPCs. Zero change indicates that an RNAi treatment had no hypoxia-specific effect – the ratio between hypoxic and normoxic sizes was the same as for controls. Roughly +20% would represent a complete blockage of hypoxia-induced size reduction. *CCHa2/CCHa2-R* results are inconsistent with each other, and a size increase upon *CCHa2-R* knockdown is inconsistent with its reported insulinotropic effects; thus perhaps the *CCHa2-R-RNAi-#1* phenotype reflects off-target effects.  $n = 1$ -14 vials (4-168 hypoxia: normoxia comparisons) per genotype. **c-d** Fat-body-specific *simA/HIF-1 $\alpha$*  RNAi-mediated knockdown (mimicking the Tor-independent aspects of fat-body normoxia) reduces hypoxia-induced DILP2 retention (**c**) and partially rescues hypoxia-induced systemic body growth inhibition (**d**). **c**:  $n = 40$ -55. **d**:  $n = 20$ -47. Statistics: two-tailed Student's t-test for pairwise comparisons versus controls. \*\*\* $P < 0.001$ , compared to the *Luciferase* control. Error bars indicate standard error of the mean (SEM). Underlying data are provided in the Source Data file.

**Supplementary Table 1.** Primers used in this study in qPCR assays.

| <b>Target gene</b>   | <b>Forward primer</b> | <b>Reverse primer</b>   |
|----------------------|-----------------------|-------------------------|
| <i>branchless</i>    | TGCCCTATCACAGAGTTGC   | ACCTACACGAACGCCATCAC    |
| <i>Dilp2</i>         | CTCAACGAGGTGCTGAGTATG | GAGTTATCCTCCTCCTCGAACT  |
| <i>Dilp3</i>         | CAACGCAATGACCAAGAGAAC | GCATCTGAACCGAACTATCACTC |
| <i>Dilp5</i>         | ATGGACATGCTGAGGGTTG   | GTGGTGAGATTTCGGAGCTATC  |
| <i>Eip75B (E75B)</i> | CAACAGCAACAACACCCAGA  | CAGATCGGCACATGGCTTT     |
| <i>InR</i>           | CTCAGCCATACCAGGGACTTT | CTCTCCATAACACCGCCATC    |
| <i>RpL32</i>         | AGTATCTGATGCCCAACATCG | CAATCTCCTTGCGCTTCTTG    |
